# Supplementary material
Source: Research Square preprint supplement (doi:10.21203/rs.3.rs-9513861/v1)
Supplement: Supplementary file 1 [file 1f7d0aebe3fd6979980b09a4.docx]

Table S1: Computed hyperspectral indices, their formulas, and corresponding references. In each formula, R denotes reflectance, and the subscript numbers represent the wavelength in nanometers (nm).

| **Spectral Index** | **Formula** | **Reference** |
| --- | --- | --- |
| Boochs | *D703* | Boochs *et al.* (1990) |
| Booch 2 | *D720* | Boochs *et al.* (1990) |
| Carter | *R695/R420* | Carter (1994) |
| D2 | *D705/D722* | Zarco-Tejada *et al.* (2003) |
| Datt 7 | *(R860-R2218)/(R860-R1928)* | Datt (1999) |
| Datt 8 | *(R860-R1788)/(R860-R1928)* | Datt (1999) |
| DWSI 1 | *R800/R1660* | Apan *et al.* (2004) |
| LWVI 2 | *(R1094-R1205)/(R1094+R1205)* | Galvao *et al.* (2005) |
| MSAVI | *0.5.(2*R800+1-((2*R800+1)2-8.(R800-R670))0.5)* | Qi *et al.* (1994) |
| NBR | *(NIR-SWIR2)/(NIR+SWIR2)* | García and Caselles (1991) |
| NPCI | *(R680-R430)/(R680-R430)* | Filella, I., & Penuelas, J. (1994) |
| NDNI | *)* | Serrano *et al.* (2002) |
| NDLI | *)* | Serrano *et al.* (2002) |
| OSAVI | *(1+0.16).(R800-R705)/(R800+R670+0.16)* | Rondeaux *et al.* (1996) |
| OSAVI 2 | *(1+0.16).(R750-R670)/(R750+R705+0.16)* | Wu *et al.* (2008) |
| REP_LE | *Red edge position through linear extrapolation* | Cho and Skidmore (2006) |
| RDVI | *(R800-R670)/(R800+R670)0.5* | Roujean and Breon (1995) |
| SAVI | *(1+L).(R800-R670)/(R800+R670+L)* | Huete (1998) |
| SWIR L1 | *3.87(R2210-R2090)-27.51(R2280-R2090)-0.2* | Lobell *et al.* (2001) |
| Sum_Dr1 | (D1 is first derivative) | Elvidge and Chen (1995) |
| Sum_Dr2 | (D1 is first derivative) | Filella and Penuelas (1994) |

Table S2: Satellite remote sensing image dataset used in the regional study

| **Satellite** | **Sensor** | **Acquisition date** | **Image Product** | **Tile number** | **Spatial resolution** |
| --- | --- | --- | --- | --- | --- |
| Sentinel – 2A | MSI (Multi-spectral Instrument) | 21 September 2020,  06 October 2020,  11 October 2020,  16 October 2020,  21 October 2020,  31 October 2020,  05 November 2020,  10 November 2020,  20 November 2020 | L2A (Surface reflectance in cartographic geometry) | T43RFN and T43RFP | Resampled at 10 m |
